# Supplementary material for: Al atom on MoO3(010) surface: adsorption and penetration using density functional theory
Source: Royal Society of Chemistry journal article supplement (doi:10.1039/c5cp07440a), 2016-01-01
Supplement: c5cp07440a1.pdf [file c5cp07440a1.pdf]

## Supporting Information

### Al atom on MoO<sub>3</sub>(010) surface: adsorption and penetration using density functional theory

Hong-Zhang Wu\*<sup>†</sup>, Sateesh Bandaru<sup>‡</sup>, Da Wang<sup>‡</sup>, Jin Liu<sup>†</sup>, Woon-Ming Lau\*<sup>§</sup>, Zhen-Ling  
Wang\*<sup>†</sup>

<sup>†</sup>The Key Laboratory of Rare Earth Functional Materials and Applications, Zhoukou Normal University, Zhoukou 466001, China

<sup>‡</sup>Beijing Computational Science Research Center, Beijing 100084, China.

<sup>§</sup>Chengdu Green Energy and Green Manufacturing Technology R&D Center, Chengdu Development Center of Science and Technology of CAEP, Chengdu, Sichuan, 610207, China.

The optimized structure parameters of Al atom at H site on MoO<sub>3</sub>(010)

Lattice parameters of Al atom at H site on MoO<sub>3</sub>(010)

|     | a        | b        | c        | alpha   | beta    | gamma   |
|-----|----------|----------|----------|---------|---------|---------|
|     | 11.17288 | 11.52252 | 33.06249 | 90.0000 | 90.0000 | 90.0000 |
|     |          | x        | y        |         | z       |         |
| O1  |          | 0.08333  | 0.17050  | 0.09890 |         |         |
| O2  |          | 0.08369  | 0.16119  | 0.38683 |         |         |
| O3  |          | 0.08531  | 0.99322  | 0.44611 |         |         |
| O4  |          | 0.25456  | 0.33022  | 0.37909 |         |         |
| O5  |          | 0.25001  | 0.01061  | 0.09127 |         |         |
| O6  |          | 0.25086  | 0.18311  | 0.03194 |         |         |
| O7  |          | 0.25000  | 0.17197  | 0.15785 |         |         |
| O8  |          | 0.24594  | 0.16530  | 0.31133 |         |         |
| O9  |          | 0.24582  | 0.32836  | 0.24976 |         |         |
| O10 |          | 0.08122  | 0.99406  | 0.32142 |         |         |
| O11 |          | 0.08336  | 0.33094  | 0.16585 |         |         |
| O12 |          | 0.08325  | 0.15503  | 0.22475 |         |         |
| O13 |          | 0.41667  | 0.17000  | 0.09939 |         |         |
| O14 |          | 0.41940  | 0.17419  | 0.39316 |         |         |
| O15 |          | 0.41716  | 0.99944  | 0.44730 |         |         |
| O16 |          | 0.58145  | 0.32907  | 0.36966 |         |         |
| O17 |          | 0.58328  | 0.01053  | 0.09134 |         |         |
| O18 |          | 0.58260  | 0.18303  | 0.03193 |         |         |
| O19 |          | 0.58328  | 0.17183  | 0.15802 |         |         |
| O20 |          | 0.58521  | 0.15778  | 0.30981 |         |         |
| O21 |          | 0.58813  | 0.32059  | 0.24984 |         |         |
| O22 |          | 0.41661  | 0.99565  | 0.32085 |         |         |
| O23 |          | 0.41663  | 0.33159  | 0.16575 |         |         |
| O24 |          | 0.41607  | 0.15943  | 0.22510 |         |         |
| O25 |          | 0.74983  | 0.17016  | 0.09900 |         |         |

|     |         |         |         |
|-----|---------|---------|---------|
| O26 | 0.74525 | 0.17357 | 0.39181 |
| O27 | 0.74372 | 1.00000 | 0.44655 |
| O28 | 0.91361 | 0.33110 | 0.38869 |
| O29 | 0.91667 | 0.01058 | 0.09107 |
| O30 | 0.91623 | 0.18311 | 0.03177 |
| O31 | 0.91660 | 0.17163 | 0.15777 |
| O32 | 0.91726 | 0.15891 | 0.31089 |
| O33 | 0.91858 | 0.31671 | 0.24874 |
| O34 | 0.74964 | 0.99473 | 0.32281 |
| O35 | 0.75009 | 0.33046 | 0.16565 |
| O36 | 0.75059 | 0.15492 | 0.22485 |
| O37 | 0.08351 | 0.50328 | 0.09963 |
| O38 | 0.08489 | 0.49339 | 0.38633 |
| O39 | 0.09975 | 0.32560 | 0.44728 |
| O40 | 0.25446 | 0.66237 | 0.37777 |
| O41 | 0.25023 | 0.34406 | 0.09191 |
| O42 | 0.25041 | 0.51584 | 0.03229 |
| O43 | 0.25005 | 0.50538 | 0.15857 |
| O44 | 0.24962 | 0.49734 | 0.30848 |
| O45 | 0.24677 | 0.66701 | 0.24959 |
| O46 | 0.07928 | 0.33145 | 0.31942 |
| O47 | 0.08310 | 0.66467 | 0.16576 |
| O48 | 0.08196 | 0.49323 | 0.22533 |
| O49 | 0.41672 | 0.50345 | 0.09970 |
| O50 | 0.41649 | 0.49791 | 0.37234 |
| O51 | 0.46417 | 0.38856 | 0.43884 |
| O52 | 0.58167 | 0.66314 | 0.36801 |
| O53 | 0.58310 | 0.34395 | 0.09189 |
| O54 | 0.58312 | 0.51584 | 0.03228 |
| O55 | 0.58362 | 0.50504 | 0.15843 |
| O56 | 0.58622 | 0.49278 | 0.30652 |
| O57 | 0.58562 | 0.66238 | 0.24933 |
| O58 | 0.41537 | 0.32480 | 0.31739 |
| O59 | 0.41668 | 0.66456 | 0.16576 |
| O60 | 0.41726 | 0.49310 | 0.22563 |
| O61 | 0.75000 | 0.50309 | 0.09953 |
| O62 | 0.75361 | 0.49823 | 0.37296 |
| O63 | 0.69377 | 0.38837 | 0.43821 |
| O64 | 0.91426 | 0.66220 | 0.38601 |
| O65 | 0.91663 | 0.34390 | 0.09178 |
| O66 | 0.91698 | 0.51569 | 0.03226 |
| O67 | 0.91675 | 0.50489 | 0.15801 |
| O68 | 0.91143 | 0.49195 | 0.30718 |
| O69 | 0.91733 | 0.66041 | 0.24866 |
| O70 | 0.75399 | 0.32359 | 0.32111 |
| O71 | 0.75029 | 0.66399 | 0.16558 |
| O72 | 0.75162 | 0.49187 | 0.22536 |
| O73 | 0.08335 | 0.83625 | 0.09884 |
| O74 | 0.08439 | 0.82534 | 0.38727 |
| O75 | 0.09873 | 0.65484 | 0.44683 |
| O76 | 0.25417 | 0.99702 | 0.37946 |
| O77 | 0.25013 | 0.67728 | 0.09201 |
| O78 | 0.25108 | 0.84801 | 0.03186 |
| O79 | 0.25002 | 0.83868 | 0.15772 |
| O80 | 0.24621 | 0.82905 | 0.31084 |
| O81 | 0.24933 | 0.99767 | 0.25295 |
| O82 | 0.07976 | 0.65856 | 0.31871 |
| O83 | 0.08326 | 0.99772 | 0.16380 |
| O84 | 0.08250 | 0.83000 | 0.22452 |
| O85 | 0.41666 | 0.83657 | 0.09933 |
| O86 | 0.42058 | 0.82720 | 0.39272 |
| O87 | 0.46348 | 0.61838 | 0.43627 |
| O88 | 0.58084 | 0.99833 | 0.37828 |
| O89 | 0.58331 | 0.67722 | 0.09201 |
| O90 | 0.58217 | 0.84810 | 0.03185 |
| O91 | 0.58326 | 0.83837 | 0.15792 |
| O92 | 0.58499 | 0.82466 | 0.30991 |

|      |         |         |         |
|------|---------|---------|---------|
| O93  | 0.58328 | 0.99062 | 0.25243 |
| O94  | 0.41579 | 0.66727 | 0.31889 |
| O95  | 0.41667 | 0.99803 | 0.16527 |
| O96  | 0.41580 | 0.82787 | 0.22501 |
| O97  | 0.74984 | 0.83628 | 0.09882 |
| O98  | 0.74396 | 0.82756 | 0.39194 |
| O99  | 0.69530 | 0.61882 | 0.43574 |
| O100 | 0.91253 | 0.99603 | 0.38080 |
| O101 | 0.91662 | 0.67722 | 0.09184 |
| O102 | 0.91656 | 0.84796 | 0.03168 |
| O103 | 0.91648 | 0.83867 | 0.15739 |
| O104 | 0.91640 | 0.82240 | 0.31203 |
| O105 | 0.91464 | 0.98807 | 0.25346 |
| O106 | 0.75342 | 0.66797 | 0.32168 |
| O107 | 0.74989 | 0.99713 | 0.16418 |
| O108 | 0.75097 | 0.82747 | 0.22471 |
| All  | 0.58028 | 0.50507 | 0.44038 |
| Mo1  | 0.08300 | 0.98573 | 0.39495 |
| Mo2  | 0.25015 | 0.19097 | 0.08316 |
| Mo3  | 0.24659 | 0.33810 | 0.30075 |
| Mo4  | 0.08326 | 0.14983 | 0.17349 |
| Mo5  | 0.41645 | 0.01536 | 0.39631 |
| Mo6  | 0.58312 | 0.19087 | 0.08316 |
| Mo7  | 0.58379 | 0.31249 | 0.30108 |
| Mo8  | 0.41659 | 0.15071 | 0.17387 |
| Mo9  | 0.74766 | 0.01480 | 0.39550 |
| Mo10 | 0.91650 | 0.19088 | 0.08300 |
| Mo11 | 0.91907 | 0.31310 | 0.29988 |
| Mo12 | 0.75000 | 0.14933 | 0.17360 |
| Mo13 | 0.08739 | 0.31937 | 0.39624 |
| Mo14 | 0.25022 | 0.52413 | 0.08351 |
| Mo15 | 0.24567 | 0.67221 | 0.30067 |
| Mo16 | 0.08334 | 0.48382 | 0.17409 |
| Mo17 | 0.42003 | 0.34846 | 0.38758 |
| Mo18 | 0.58336 | 0.52408 | 0.08350 |
| Mo19 | 0.58329 | 0.64908 | 0.30048 |
| Mo20 | 0.41696 | 0.48427 | 0.17435 |
| Mo21 | 0.74929 | 0.34842 | 0.38782 |
| Mo22 | 0.91679 | 0.52406 | 0.08348 |
| Mo23 | 0.91912 | 0.64849 | 0.29961 |
| Mo24 | 0.75035 | 0.48317 | 0.17410 |
| Mo25 | 0.08740 | 0.65216 | 0.39577 |
| Mo26 | 0.25020 | 0.85733 | 0.08306 |
| Mo27 | 0.24885 | 0.00621 | 0.30400 |
| Mo28 | 0.08308 | 0.81784 | 0.17338 |
| Mo29 | 0.42017 | 0.67461 | 0.38644 |
| Mo30 | 0.58310 | 0.85727 | 0.08305 |
| Mo31 | 0.58247 | 0.98102 | 0.30358 |
| Mo32 | 0.41651 | 0.81763 | 0.17382 |
| Mo33 | 0.74935 | 0.67426 | 0.38671 |
| Mo34 | 0.91656 | 0.85727 | 0.08288 |
| Mo35 | 0.91568 | 0.97975 | 0.30455 |
| Mo36 | 0.75001 | 0.81697 | 0.17354 |

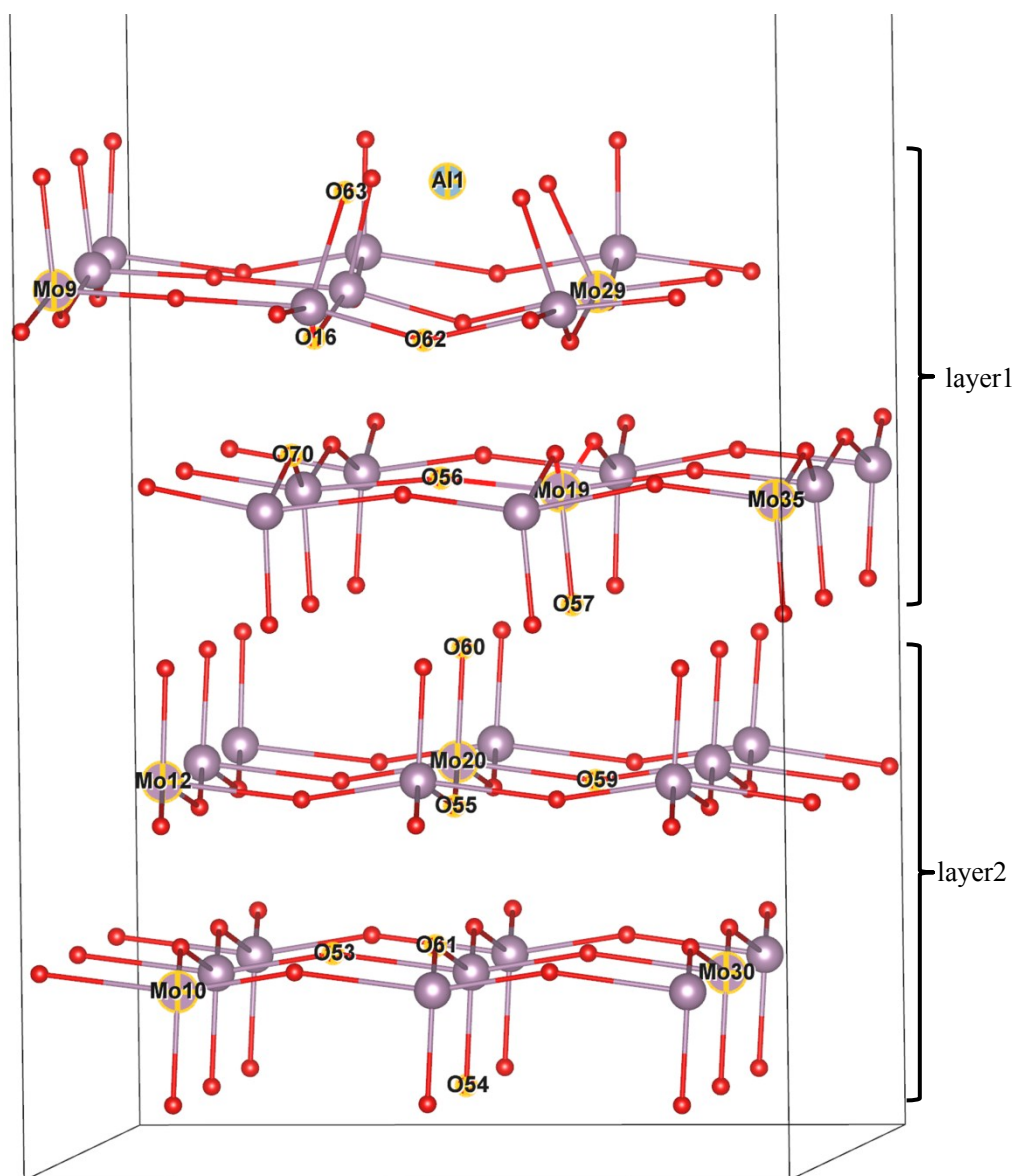

Supporting Figure S1. The optimized configuration of Al atom at H site of MoO<sub>3</sub>(010) surface.

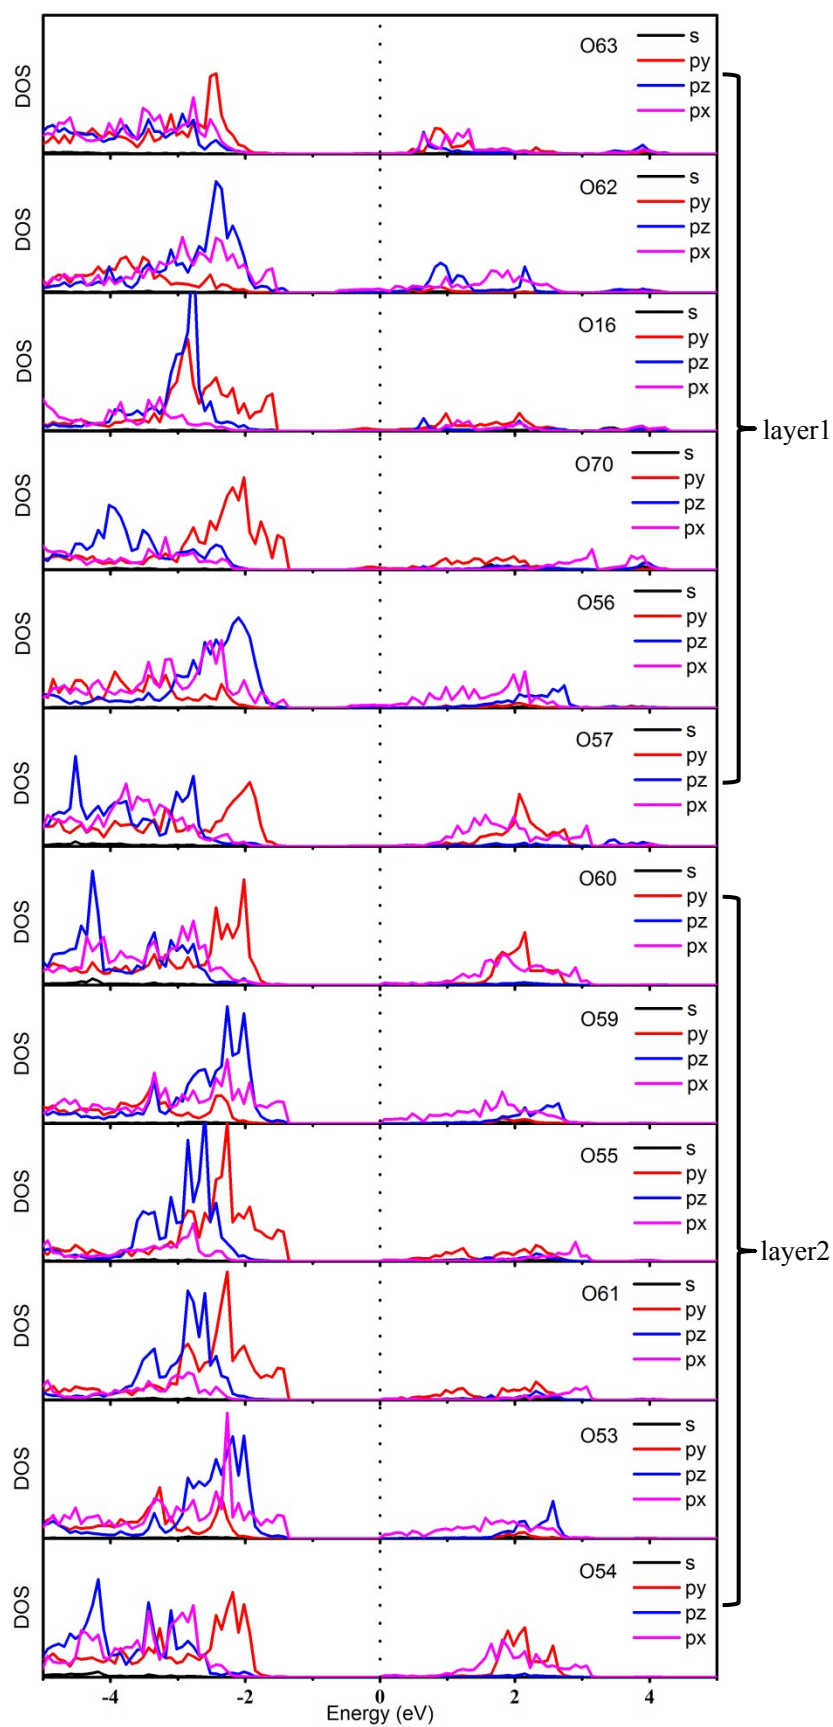

Supporting Figure S2. The PDOS of some oxygen atoms in the configuration of Al atom at H site of  $\text{MoO}_3(010)$  surface.

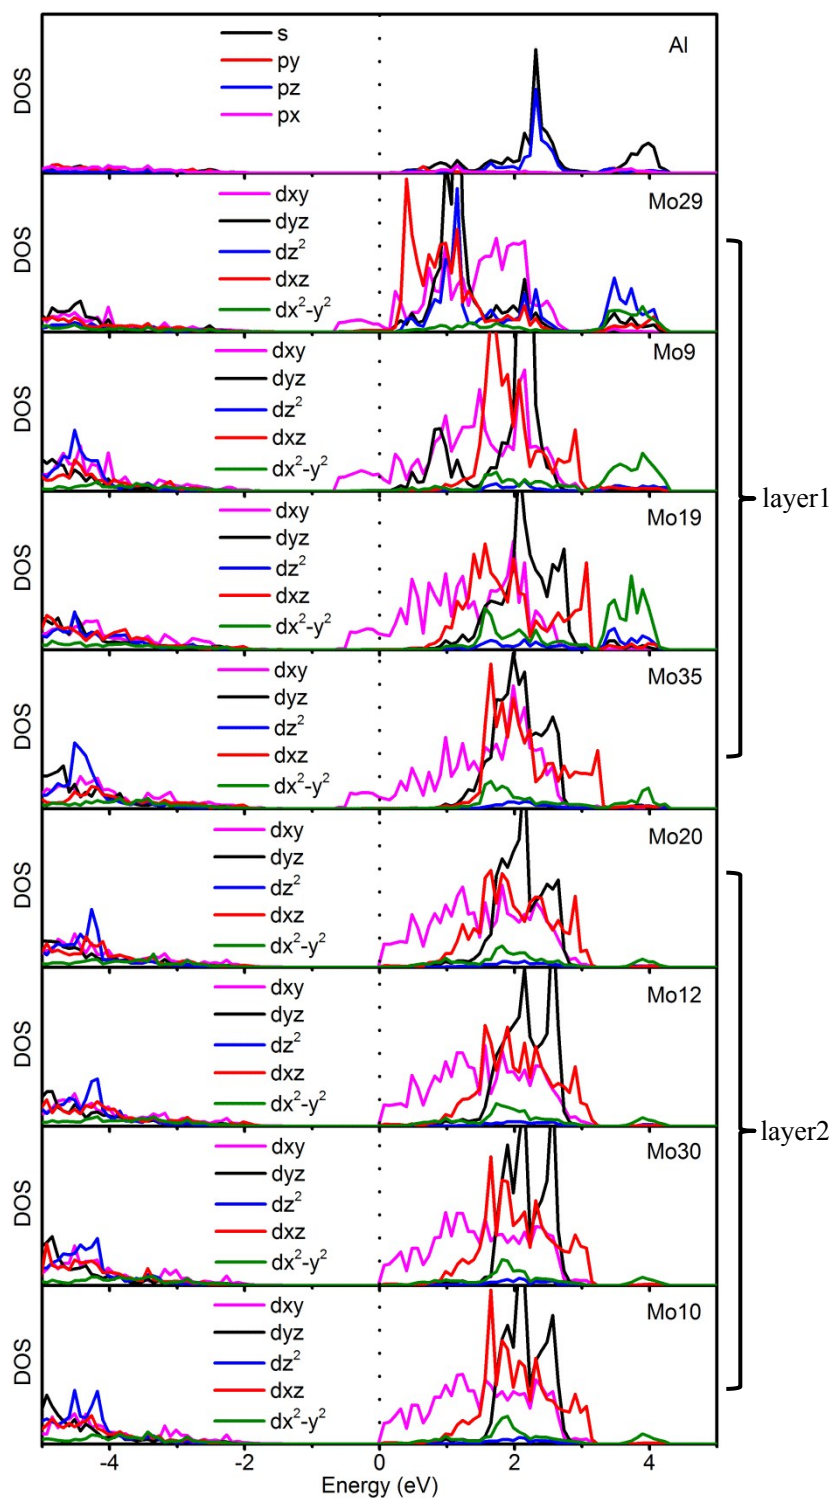

Supporting Figure S3. The PDOS of Al atom and some Mo atoms in the configuration of Al atom at H site of  $\text{MoO}_3(010)$  surface.

The charge density difference is that the charge density of Al/ $\text{MoO}_3$  subtracts that of Al atom and  $\text{MoO}_3(010)$ . Al atom has three valence electrons; Mo and O atom both have six valence electrons.

The charge density of Al atom is smaller than that of Mo and O atom. The isovalues of the charge density are represented with 0.25 a.u for pure MoO<sub>3</sub>, while the isovalues of the charge density are represented with 0.018 a.u for Al/MoO<sub>3</sub>(010).

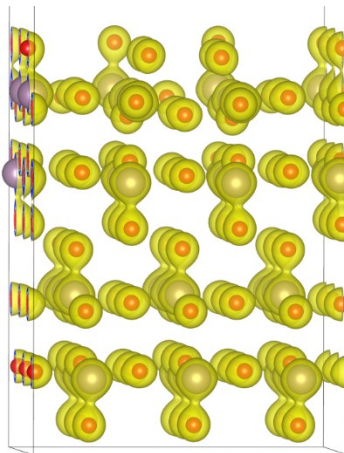

Supporting Figure S4. Isosurface (isovalues: 0.25 a.u) of the charge density of pure MoO<sub>3</sub>.
